## FSH, Bone Mass, Body Fat, and Biological Aging

Mone Zaidi,<sup>1,2</sup> Daria Lizneva,<sup>1,2,3</sup> Se-Min Kim,<sup>1,2</sup> Li Sun,<sup>1,2</sup> Jameel Iqbal,<sup>1,2</sup> Maria I. New,<sup>1,4</sup> Clifford J. Rosen,<sup>5</sup> and Tony Yuen<sup>1,2</sup>

<sup>1</sup>The Mount Sinai Bone Program, Icahn School of Medicine at Mount Sinai, New York, New York 10029; <sup>2</sup>Department of Medicine, Icahn School of Medicine at Mount Sinai, New York, New York 10029; <sup>3</sup>Department of Reproductive Health Protection, Scientific Center of Family Health and Human Reproduction, Irkutsk 664003, Russian Federation; <sup>4</sup>Department of Pediatrics, Icahn School of Medicine at Mount Sinai, New York, New York 10029; and <sup>5</sup>Maine Medical Center Research Institute, Scarborough, Maine 04074

The Study of Women's Health Across the Nation has taught us that impending ovarian failure during late perimenopause is associated with a sharp rise in serum FSH, which coincides with the most rapid rate of bone loss and the onset of visceral adiposity. At this time in a woman's life, serum estrogen levels are largely unaltered, so the hypothesis that hypoestrogenemia is the sole cause of bone loss and visceral obesity does not offer a full explanation. An alternative explanation, arising from animal models and human data, is that both physiologic aberrations, obesity and osteoporosis, arise at least in part from rising FSH levels. Here, we discuss recent findings on the mechanism through which FSH exerts biological actions on bone and fat and review clinical data that support a role for FSH in causing osteoporosis and obesity. We will also provide a conceptual framework for using a single anti-FSH agent to prevent and treat both osteoporosis and obesity in women across the menopausal transition. (*Endocrinology* 159: 3503–3514, 2018)

It became clear as early as 1989 that women can lose bone between the ages of 35 and 50 in the presence of regular cycles and high serum FSH levels (1). Since then, multiple reports have documented not only early postmenopausal bone loss but also profound decrements in bone mineral density (BMD) before the onset of menopause, particularly during the latter third of the perimenopausal transition (2–11). This bone loss continues unabated for the next two decades (8, 10, 12, 13). The most well-studied population of perimenopausal women is the Study of Women's Health Across the Nation (SWAN), a longitudinal and cross-sectional study that examined several biological parameters, including bone mass, body fat, and physical activity, in an ethnically diverse cohort of >2000 perimenopausal women (9–11). Notably, there were profound reductions in BMD and high resorption rates ~2 to 3 years before menopause, irrespective of ethnicity. This phase of bone loss is associated with increases in body weight and visceral adiposity, as well as dysregulated energy homeostasis and reduced physical activity (14, 15). All these aberrations occurred in the face of rising serum FSH levels when serum estrogen levels were

normal (Fig. 1A) (11, 16). This finding suggests alternative mechanisms in parallel with the well-characterized role of estrogen in the regulation of body composition.

In 2006, we published the first evidence that, by increasing bone resorption by osteoclasts, FSH could itself regulate bone mass in animal models (17). More recently, we found that FSH regulates body fat and that blocking FSH action on its receptor, expressed in both bone and fat cells (17, 18), not only increases bone mass but also reduces body fat profoundly and induces thermogenic "beige" adipose tissue (19). These data, replicated in C.J.R.'s laboratory (19, 20), have laid the foundation for using an anti-FSH agent, in our case a monoclonal FSH blocking antibody (18) to treat osteoporosis and obesity concurrently and, in particular, prevent bone loss and visceral adiposity during the later years of the perimenopausal transition.

### Bone Loss and Fat Gain Occur Concurrently During Late Perimenopause

Postmenopause is formally defined as the permanent cessation of menstrual periods for 12 consecutive months

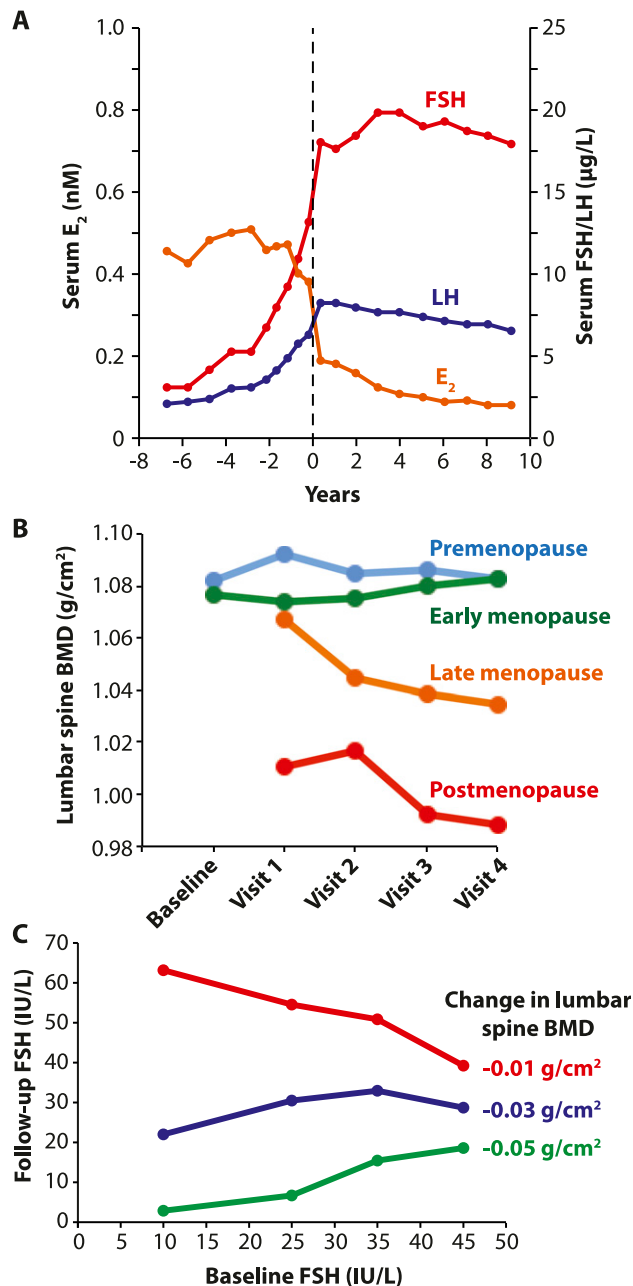

**Figure 1.** Relationship between serum FSH levels and BMD across the menopausal transition. (A) Hormonal profiles before and after menopause (dashed line) show that serum FSH levels begin to rise even when estrogen is within the normal range. (B) BMD changes over a 5-year timeframe in the SWAN. (C) Correlation between baseline and 4-year measurements of FSH at three levels of BMD change (noted). Figure 1A: Reproduced with permission from Rannevik G, Jeppsson S, Johnell O, et al. A longitudinal study of the perimenopausal transition: altered profiles of steroid and pituitary hormones, SHBG and bone mineral density. *Maturitas* 1995; 21: 103–113. Figures 1B and 1C: Reproduced with permission from Sowers MR, Jannausch M, McConnell D, et al. Hormone predictors of bone mineral density changes during the menopausal transition. *J Clin Endocrinol Metab* 2006; 91(4):1261–1267. E<sub>2</sub>, estradiol.

Reproductive Aging Workshop (STRAW) defined perimenopause, also known as the menopausal transition, as the transitory period from reproductive age through to menopause that includes the onset of irregular cycles together with profound endocrine changes (21). Perimenopause begins on average at age 47 years. Perimenopause and postmenopause are both divided into early and late stages (21).

Longitudinal and cross-sectional studies show that rates of bone loss are the highest during perimenopause and that these affect mainly trabecular bone (9–11). The ongoing SWAN has reported more than two decades of observations showing accelerated lumbar spine bone loss in a multiethnic cohort of 2375 eugonadal women between ages 42 and 52 years (Fig. 1B) (9–11, 22). The mean annual change in lumbar spine BMD was greatest 1 to 2 years after the last menstrual period (2.16% per year) (22); this drop occurred even while BMD values remained in the normal range (10, 22). The evidence for interim bone loss was confirmed through increased bone turnover markers during late perimenopause but when menstrual cycles were still regular (8). Bone biopsies in a subgroup of women provided direct evidence for accelerated activation frequency, a measure of osteoclast activity, 1 year after menopause (23). Notably, this acceleration begins during the final years of menopausal transition and continues over the next two decades (8, 10, 12, 13). These high levels of bone resorption and decrements in BMD in perimenopausal women occur even at normal serum estrogen levels (10). However, women in this phase are often not diagnosed by standard BMD assessments.

Furthermore, women undergoing the menopausal transition display a marked deterioration in bone microarchitecture that is synchronous with the rapidity of bone loss, as evidenced by histomorphometry and high-resolution microcomputed tomography of bone biopsies (24). About 13% of trabecular bone loss is attributable to the decreased trabecular number and increased trabecular perforation (24). Interestingly, women lose bone primarily by perforation of trabeculae, whereas men lose bone by trabecular thinning (25). Trabecular perforation causes a significantly greater reduction in bone strength than trabecular thinning, as elegantly demonstrated *via* three-dimensional spatial modeling and Voronoi tessellation (26). This trabecular perforation is an irreversible change, and lost trabeculae cannot be rebuilt.

Perimenopausal and early postmenopausal women generally undergo weight gain and changes in body composition. An increase in body mass index (BMI) among middle-aged women is typically attributable to aging, as multiple studies have demonstrated that women gain weight regardless of menopausal state (27–30). The Healthy Women Study reported an increase in weight of ~2 kg over the 3-year study period in women >40 years

in the absence of any other obvious pathological or physiological cause. The median age of US women at the time of menopause is 51.4 years. The Stages of

of age. However, there was no difference in the extent of weight gain between premenopausal and early postmenopausal women (31). Likewise, in the SWAN participants, mean weight increased by 2.1 kg over a 3-year follow-up study, further substantiating the premise that menopausal status alone was not associated with a change in weight (32).

In contrast to BMI, climacteric deposition of visceral adipose tissue has been attributed to the menopausal state in several cross-sectional (33, 34) and longitudinal studies (35–38). For example, a higher percentage of fat was found in the trunk region in perimenopausal compared with premenopausal women, whereas fat deposits in the arm were higher in postmenopausal women (39). Moreover, the Michigan cohort in the SWAN showed a 6-year increase of 6 cm in waist circumference and a decrease in skeletal muscle mass of ~0.23 kg (40). All of these changes persisted despite adjustment for chronologic age (40). Importantly, the studies used objective measures such as CT, MRI, or dual-energy X-ray absorptiometry (35, 41–44) to confirm an increase in visceral fat in early perimenopausal and postmenopausal women.

### Serum FSH and Bone Loss in Women

Epidemiological data suggest that decrements in bone mass during the perimenopausal transition and after menopause can be predicted by changes in serum FSH (10, 11). SWAN data showed that bone turnover markers and BMD in perimenopausal and early postmenopausal women are independent of serum estrogen, and they displayed a strong negative correlation with serum FSH. Importantly, 4-year changes in serum FSH levels predicted decrements in BMD (Fig. 1C) (10, 16). Furthermore, low serum FSH and high estrogen have been associated with lower rates of lumbar spine bone loss during menopausal transition (22).

The predictive value of serum FSH for bone loss has been confirmed in a number of clinical studies across the globe, including Europe (45–49). The Italian Bone Turnover Range of Normality study showed that women with serum FSH levels >30 IU/L displayed significantly higher bone turnover markers than age-matched women, despite having regular menstrual periods (45). Similarly, serum osteocalcin and C-terminal telopeptide of type I collagen (CTX) levels positively correlated with serum FSH but not with estradiol in a cross-sectional study of 92 postmenopausal women from Spain (47). Likewise, there were strong correlations between serum FSH and femoral neck BMD in the US National Health and Nutrition Examination Survey III cohort of women between 42 and 60 years of age (46). Univariate regression analyses further showed that BMD was inversely related to serum FSH in premenopausal

and early menopausal women in a recent US cross-sectional study (50). One study did not show a relationship between bone mass and FSH or, indeed, estrogen (51).

Relationships between high serum FSH and bone loss have been extensively documented in Chinese cohorts. Strong correlations between high levels of bone loss, increased bone turnover markers, and high serum FSH levels have been noted (48, 49), such that, for example, women in the highest quartile of serum FSH lost bone at a rate 1.3 to 2.3 times higher than those in the lowest quartile (52). In another Chinese cohort, high serum FSH levels tracked with increased *ex vivo* expression of bone resorption genes, namely *RANK*, *ACP5*, *MMP9*, and *CTSK* (53). Likewise, a more recent analysis of perimenopausal women between 45 and 50 years of age revealed a strong correlation between serum levels of CTX and FSH (54). CTX levels were higher when serum FSH levels were >40 IU/L (54). Further substantiating this relationship, healthy women between 20 and 82 years of age showed a strong correlation between serum FSH and BMD at different skeletal sites and reported a higher prevalence of overt osteoporosis when serum FSH levels were in the upper quartile (49).

Although these studies are correlative, there are clinical indications that serum FSH may contribute to the bone loss that has hitherto been attributed solely to declining estrogen. Most notably, women with hypergonadotropic hypogonadism with mean serum FSH levels of ~35 IU/L displayed greater bone loss than those with hypogonadotropic hypogonadism with mean serum FSH ~8 IU/L (55). Concordant with this finding, women with functional hypothalamic amenorrhea have been found to develop only modest bone loss over time (56, 57).

Finally, and perhaps most importantly, evidence from genetic polymorphisms points to the function of the FSH receptor (FSHR) in human pathophysiology. An activating *FSHR*<sup>N680S</sup> polymorphism in women results in high resorption markers and low bone mass (58). Likewise, digenic combinations between wild-type genotypes of 3' untranslated region or IVS4 markers for the *CYP19A1* gene and the *BMP15* and *FSHR* genes yield skeletal protection (59). Together, these data suggest a modulatory effect of FSH on human bone physiology and a role in the pathophysiology of postmenopausal osteoporosis.

### Direct Action of FSH on Bone in Mice

Evidence for a direct effect of FSH on bone cells has accumulated since our discovery of a proresorptive action (17). In bone, FSH acts through a distinctly shorter FSHR isoform to increase osteoclast formation, function, and survival (17, 53, 60–62). The early failure to identify FSHR on osteoclasts was probably caused by the use of

PCR primers that targeted the full-length ovarian FSHR (63, 64). We and other have repeatedly detected FSHR in human CD14<sup>+</sup> cells and osteoclasts by using nested PCR to amplify regions containing an intron to avoid genomic DNA contamination, with Sanger sequencing to confirm the identity of the PCR products (60, 65). Indeed, FSH binding to bone has been unequivocally established *in vivo* (18, 66). The injection of FSH conjugated with a small near-infrared fluorophore CH1055 into live mice resulted in the capture of infrared signals not only in ovaries and testes but also in bone; the fluorophore was displaced when a 100-fold molar excess of unlabeled FSH was infused, establishing specificity (66). Recombinant FSH molecules with variable glycosylation levels should be used cautiously because it is now known that the fully glycosylated 24-kDa isoform is more active on the bone FSHR, whereas the partially glycosylated 21-kDa isoform best activates the ovarian receptor (67, 68). Indeed, the age-related decline in the abundance of partially glycosylated FSH may contribute to the decreased fertility in older women (69).

FSH acts directly on bone through direct and indirect mechanisms. First, FSH acts directly on FSHR on osteoclast precursors to increase osteoclastogenesis by sensitizing the MAPK, NF $\kappa$ B, and AKT pathways (17). Additionally, unlike coupling of the ovarian FSHR to G $\alpha_s$ , the bone FSHR interacts with G $\alpha_{i2}$ , thereby reducing rather than elevating cellular cAMP levels. The absence of G $\alpha_{i2}$  or abrogation of any downstream signaling cascade by chemical inhibitors, dominant negative molecules, or knockout cells abolishes FSH responsiveness (17). Interestingly, the response to FSH is abolished in mice lacking immunoreceptor tyrosine-based activation motif signaling mediated by DAP12 or Fc receptor  $\gamma$  chain. The latter finding suggests an interaction between FSH and immune receptor complexes (62). Second, FSH increases expression of the receptor activator of nuclear factor  $\kappa$ B (70) and indirectly stimulates osteoclastogenesis by releasing cytokines, namely IL-1 $\beta$ , TNF- $\alpha$ , and IL-6 in proportion to the surface expression of FSHR (50, 71). Not unexpectedly, therefore, in a study of 36 women between the age of 20 and 50 years, serum FSH levels correlated with circulating cytokine concentrations (50).

Consistent with the proresorptive action of FSH *in vitro*, ovariectomy-induced bone loss in rats was augmented by the exogenous administration of FSH and was reduced by injection of an FSH antagonist (72, 73). Mice haploinsufficient or absent in *Fsh $\beta$*  or *Fshr* showed reduced bone resorption and increased bone mass (17); however, we acknowledge that this increase in bone mass may be explained in part by the accompanying hyperandrogenemia caused by conserved luteal function (74). However, this effect cannot be solely responsible for the

high bone mass, because mice lacking aromatase have an equivalent increase in serum testosterone but lose bone profoundly (75). Furthermore, we found that even in male mice, the inhibition of FSH action by a blocking antibody increases bone mass (19). Furthermore, a GST-FSH $\beta$  antigen was found to prevent trabecular bone loss and increased bone strength in ovariectomized rats (76).

It has indeed been difficult to separate the action of FSH from that of estrogens on bone *in vivo*. FSH promotes the secretion of estrogen from the ovaries to increase bone mass, whereas it has an opposite effect in directly stimulating osteoclastic bone resorption. Thus, the modulation of FSH action *in vivo*, such as with the use of recombinant FSH to treat mice with intact ovaries (64), or transgenic expression of human FSH (63), even in *hpg* mice, is unlikely to clearly demonstrate the proresorptive properties of FSH. In any of aforementioned cases, the direct effects of FSH on bone are confounded by the opposite actions of estrogen. At the same time, low FSH levels in women are associated with less bone loss (55). Therefore, the effectiveness of estrogen therapy is related to the degree of FSH suppression (77). In contrast, the use of GnRH agonists does not prevent bone resorption, wherein reduction of endogenous estrogen levels appears not to be compensated by the suppressed FSH (78). Thus, we believe and agree with others (79) that the selective inhibition of FSH action, with modest or no effects on serum estrogen, will be the best way forward for establishing the direct effects of FSH.

Thus, to specifically leverage the increase in FSH early in menopausal transition, as noted earlier, and to inhibit FSH action, we generated an antibody to a 13-amino acid peptide sequence within the receptor-binding domain of the FSH  $\beta$ -subunit (80, 81). This antibody blocked FSH action on osteoclast formation *in vitro* (18, 81). When injected into ovariectomized mice, the FSH antibody attenuated bone loss not only by inhibiting bone resorption but also by stimulating bone formation (17, 80, 81). Notably, mice treated with FSH antibody or mice deficient in *Fshr* showed more osteoblast precursors in stromal cells (80). This suggested that FSH also acted *via* FSHR present on mesenchymal stem cells to negatively regulate differentiation to the osteoblast lineage (80).

### Clinical Associations Between Serum FSH and Body Fat

Several studies have characterized the relationship between serum FSH levels and body composition in perimenopausal and postmenopausal women. Longitudinal data from women in the Michigan cohort of SWAN displayed a positive correlation between changes in

serum FSH and fat mass over a 6-year period during the menopausal transition (40). Increasing FSH levels were associated with increases in waist circumference and fat mass, even after adjustments for baseline measures (40). Likewise, in the Penn Ovarian Aging Study, multivariable linear regression modeling revealed that serum FSH and estradiol were each associated with increased visceral fat volume (15). Specifically, FSH was inversely related to visceral fat tertiles (15). Consistent with these studies, the Oklahoma Postmenopausal Health Disparities Study, a large multiethnic cohort of postmenopausal women, reported that waist-to-hip ratio correlates positively with serum FSH and estrogen (82). Likewise, a study conducted in north India among infertile premenopausal women showed a positive correlation between serum FSH and indicators of central obesity, including waist circumference and waist/hip ratio (83).

There have also been interesting reports documenting a negative association between serum FSH and lean mass in women, and these findings are consistent with our observations that blocking FSH increases lean mass in mice (19). An independent association was noted between high serum FSH and lower lean mass, after adjusting for multiple confounders and covariates in postmenopausal US women (84). Likewise, the cross-sectional Study of Women Entering and in Endocrine Transition, conducted among Sub-Saharan African postmenopausal women, showed that lean mass was significantly lower in women with high FSH levels (85).

Despite the strong positive correlations observed between serum FSH and fat mass, the 11-year SWAN follow-up, the Pan Asia Menopause Study, and several other studies have shown paradoxically that low serum FSH levels occur in women with a high BMI (86–91). This paradox probably arises from feedback inhibitory effects of estrogen produced by aromatization in fat tissue on FSH production. In men there appears to be no clear association between serum FSH and BMI across age groups (92–95). With that said, there is compelling evidence for positive associations between serum FSH levels and metabolic syndrome. A cross-sectional study of 320 postmenopausal women from Poland showed that serum FSH was a better predictor of metabolic syndrome than serum SHBG, C-reactive protein, or leptin (96, 97).

Associations between serum FSH levels and bone marrow adipose tissue (BMAT) have not been studied. Nonetheless, ovariectomy induces both bone loss and bone marrow adiposity in mice and humans (98, 99). In postmenopausal women and in premenopausal women who undergo gonadotrophin agonist treatment, there is a rapid and substantial increase in vertebral BMAT, as measured by magnetic resonance spectroscopy, typically occurring within ~2 weeks. Aging humans similarly

display marked increases in femoral and vertebral BMAT, primarily in the regulated marrow adipose tissue compartment. In some cases, BMAT increases can, at least in part, be reversed by estrogen replacement (100).

## Evidence for an Action of FSH on Fat

We recently published evidence for direct effects of FSH on fat tissue, thus documenting FSH as a fat-stimulating hormone (19). We found that FSH acts *via* a pertussis toxin-sensitive  $G\alpha_i$ -coupled FSHR on adipocytes, which we cloned and Sanger sequenced from both primary adipocytes and differentiated 3T3.L1 cells (19). We found that FSHR activation opposes the  $\beta_3$ -adrenergic signaling cascade in reducing cAMP levels and in attenuating *Ucp1* activation in dedifferentiated brown adipocytic Thermo cells (Fig. 2). FSHR activation also increased the expression of the core fat genes *Lpl*, *Fas*, and *Pparg* (19).  $G\alpha_i$ -mediated FSHR signaling in human and mouse adipocytes is concordant with previous evidence, which shows that the FSHR activation is negatively coupled through protein kinase A to the inhibition of p38 phosphorylation and reduced transcriptional activation of CREB and ATF2 (Fig. 2) (19, 103, 104).

Through computational modeling, we identified a 13-amino acid epitope as the receptor-binding motif of FSH $\beta$ , which we have since fine mapped (18, 19). Modeling of the FSH-FSHR complex predicted that capping this FSH $\beta$  epitope with an IgG (antibody) would prevent the entry of FSH $\beta$  into the FSHR binding pocket, thus blocking its action. Using UCP1 as the reporter in Thermo cells, we showed that the FSH antibody at 1  $\mu$ g/mL indeed completely reversed the FSH-mediated *Ucp1* inhibition. Pharmacokinetic studies showed a peak serum concentration of the FSH antibody of 20  $\mu$ g/mL, with a half-life of 25.6 hours, after a single injection; this was far higher than the *in vitro* requirement (19). The FSH antibody dramatically reduced body fat in all compartments, namely viscera, subcutaneous tissue, and bone marrow, and in every mouse model tested: mice pair-fed on a high-fat diet, mice pair-fed on regular chow, mice allowed to consume regular chow *ad libitum*, and ovariectomized and sham-operated mice (Fig. 3) (19). The data sets were contemporaneously reproduced at several laboratories and replicated with different technologies, notably dual-energy X-ray absorptiometry, microcomputed tomography, quantitative nuclear magnetic resonance, and simple tissue weight measurements (19, 20). Important to note is that serum estrogen levels did not change after  $\leq 8$  weeks of daily antibody treatment (19). We believe that the concentration of “active” FSH (not bound to the antibody) in antibody-treated mice is enough to activate follicular cells of the ovaries,

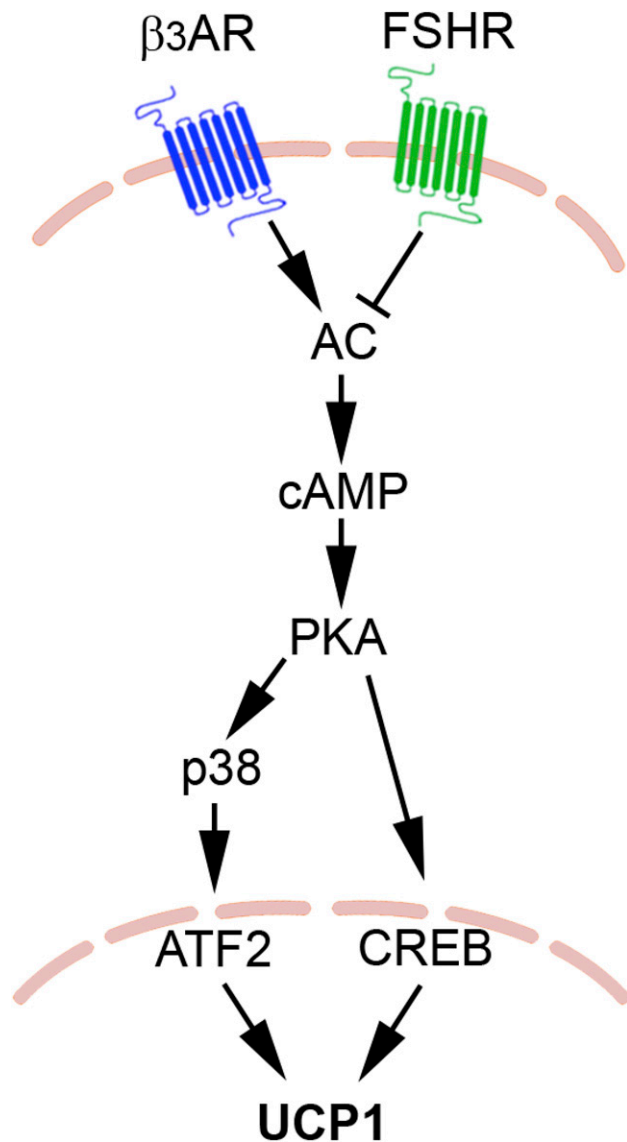

**Figure 2.** Mechanism of action of FSH on adipocytes. The newly described FSH signaling pathway opposes  $\beta_3$  adrenergic signaling. The latter is known to cause “beiging” via interaction of the  $\beta_3$  receptor with a  $G_{\alpha_s}$  protein that stimulates cAMP production and activates the MAPK p38 and the transcription factor ATF2, which then translocates to the nucleus to cause the transcriptional activation of the *Ucp1* gene (101, 102). FSH opposes this action by interacting with a  $G_{\alpha_i}$ -coupled FSHR, also involving CREB-mediated pathway (19, 103).

but the concentration probably falls below that needed to activate nonovarian tissues, namely bone and fat. We have consistently found that inhibition of FSH action or its genetic haploinsufficiency does not alter serum estrogen (17, 80). Furthermore, the effect of the FSH blocking antibody was recapitulated in male *Fshr*<sup>+/-</sup> mice pair-fed on a high-fat diet. As would be expected, the FSH antibody did not reduce body fat in the *Fshr*<sup>+/-</sup> mice, thus establishing FSH specificity (Fig. 3) (19). And, concordant with earlier findings, there was a notable increase in bone mass (Fig. 3) (19, 80).

In addition to what would be considered a profound reduction of body fat, administration of the FSH blocking antibody also induced marked “beiging” of white adipose tissue, noted best in UCP1-labeled sections. Consistent with this phenotype, we documented a significant increase in the expression of brown fat genes in white adipose tissue, notably *Ucp1*, *Cox7*, *Cidea*, and *Cox8a* (19). This white adipose tissue beiging was coupled with brown adipose tissue activation, both of which were documented with the ThermoMouse, a transgenic line in which the *Ucp1* promoter drives *Luc2* expression (stock number 026690, Jackson Laboratory). *In vivo* IVIS-based imaging (Perkin Elmer) showed early increases in *Luc2* (UCP1) radiance in brown fat–rich areas, followed by enhanced radiance in the inguinal, mainly white adipose tissue–containing, region at 8 weeks (Fig. 3) (19). Importantly, the beiging response remained intact under thermoneutral conditions and, as far as we can determine by measuring noradrenaline post- $\alpha$ -methyl-*p*-tyrosine, was not mediated by increased sympathetic tone.

With that said, and consistent with white adipose tissue beiging, indirect calorimetry with metabolic cages showed increased basal energy expenditure, together with increases in certain physical activity parameters. Overall, therefore, FSH inhibition, pharmacologically or genetically, yielded a phenotype of reduced body weight and thermogenic adipose tissue accrual. Surprisingly, insulin sensitivity and glucose tolerance were not improved in these mice, a finding that remains unexplained mechanistically, particularly because serum FSH levels in women predict the onset of metabolic syndrome (96, 97). Equally unclear is how the “beige” cell is derived, whether through the transdifferentiation of existing white adipocytes or from a committed precursor (105, 106).

### Serum FSH Is Associated With Cardiovascular Risk

Several studies have reported the relationship between serum FSH levels and cardiovascular risk measures, such as carotid intima-media thickness and coronary artery calcium deposition. The Assessment of the Transition of Hormonal Evaluation With Noninvasive Imaging of Atherosclerosis study identified a direct association between serum FSH and aortic plaque number in perimenopausal women by using contrast-enhanced CT angiography and carotid ultrasound (107). Another cross-sectional study of premenopausal and postmenopausal women reported significant correlations between serum FSH and ultrasound measures of carotid intima-media thickness (108). In contrast, a population-based longitudinal Survey on Prevalence in East China for Metabolic Diseases and Risk Factors in 2658 postmenopausal

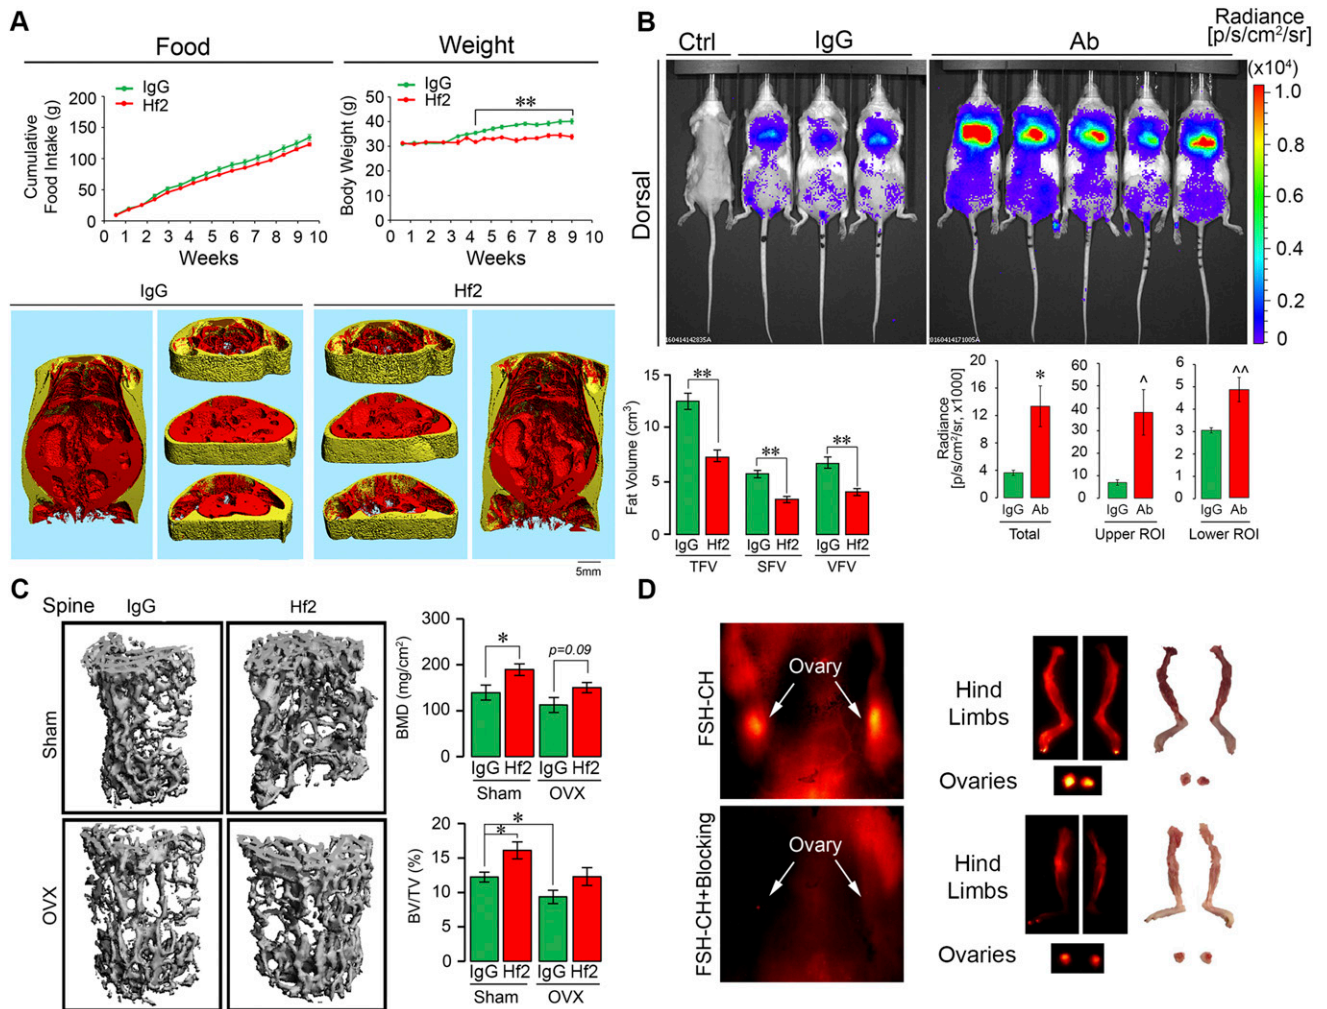

**Figure 3.** Antiobesity and bone-protective actions of FSH blockade. (A) Our monoclonal FSH blocking antibody, Hf2, raised to the FSHR-binding epitope of human FSH $\beta$ , triggered a sharp reduction in body weight and body fat, measured by microcomputed tomography in male mice paired on a high-fat diet. Shown are total, subcutaneous (yellow), and visceral (red) fat volumes. Polyclonal FSH antibody (Ab) (and Hf2) also caused “beiging” and brown adipose tissue activation, which was confirmed in the ThermoMouse, a surrogate for UCP1 activation, after 8 weeks of daily IP injections. (B) Radiance in the upper and lower regions of interest (ROIs) is shown. Hf2 showed potent osteoprotective actions in preventing ovariectomy-induced bone loss after 4 weeks of daily injections. (C) Micro-CT images and microstructural parameters, namely BMD and fractional bone volume (BV/TV) are shown. (D) *In vivo* binding of fluorescently labeled human FSH (FSH-CH) to ovary and bone (upper panel), and its displacement by a 100 $\times$  unlabeled FSH (bottom panel). \* $P \leq 0.05$ ; \*\* $P \leq 0.01$ , or as shown;  $\wedge P = 0.060$ ;  $\wedge\wedge P = 0.051$ . These data collectively establish that interruption of Fshr signaling pharmacologically induces a lean thermogenic, high-bone mass phenotype. Figures 3A and 3B: Reproduced with permission from Liu P, Ji Y, Yuen T, et al. Blocking FSH induces thermogenic adipose tissue and reduces body fat. *Nature* 2017; 546:107–112. Figures 3C and 3D: Reproduced with permission from Ji Y, Liu P, Yuen T, et al. Epitope-specific monoclonal antibodies to FSH $\beta$  increase bone mass. *Proc Natl Acad Sci USA* 2018; 115(9):2192–2197. Ctrl, control; OVX, ovariectomy; SFV, subcutaneous fat volume; TFV, total fat volume; VFV, visceral fat volume.

women showed that mean cardiovascular risk was decreased with increased serum FSH levels (109). However, longitudinal data derived from 856 women from SWAN documented that lower serum FSH levels were related to lower intima-media thickness compared with medium- and high-FSH groups (110).

### FSH: An Aging Hormone?

Bartke *et al.* (111) recently surmised that suppressed FSH levels may contribute to longevity. They found that a 20% to 60% increase in longevity mirrors a 50%

reduction in serum FSH both in *Ames* mice that are deficient in the pituitary transcription factor *Prop1* and in *Laron* mice that lack the growth hormone receptor (112, 113). In addition to their increased lifespan and reduced rates of aging, both *Ames* and *Laron* mice display a metabolic phenotype (114–117) that is surprisingly similar to that described by us in *Fshr*<sup>+/-</sup> mice and in wild-type mice treated with our blocking FSH antibody (19). Matching phenotypic features include reduced adiposity, beiging of white adipose tissue, brown adipose tissue activation, and increased energy expenditure (114–116). Furthermore, similarly to the sex-independent

action of blocking FSH that we noted (19), the metabolic phenotypes of *Laron* and *Ames* mice are equally prominent in both males and females (113). However, it has been difficult, if not impossible, to molecularly explain the increased lifespan, or indeed, the metabolic phenotype of the *Ames* and *Laron* mutants because of multiple hormonal perturbations, including decrements in serum TSH, LH, and prolactin levels and reduced or absent GH signaling (118, 119). The close phenotypic similarity nonetheless prompts further studies into whether reduced FSH signaling can contribute, even in part, to longevity, particularly when the primary reproductive function of FSH is no longer needed (111).

In fact, several clinical observations compel further studies into the action of FSH across the process of biological aging. First, serum FSH increases track with age in both women and men, at a rate of 3.5% per year in the latter (120). Second, high FSH levels have recently been implicated in the visceral obesity and cardiovascular risk in patients with prostate cancer on androgen deprivation therapy (121). This newly described action of FSH is in addition to its possible contribution to the acute rapid and severe bone loss in these patients (122). Third, as noted earlier, serum FSH levels rise sharply before the last menstrual period to compensate for reduced ovarian reserve but with estrogen remaining normal (10, 16, 123). This high-FSH, estrogen-replete period witnesses the most rapid rates of bone loss and the onset of visceral adiposity, weight gain, disrupted energy balance, and reduced physical activity (10, 14, 16, 123). And, importantly, visceral adiposity itself increases the long-term risk of diabetes, metabolic syndrome, cardiovascular disease, and cancer.

## Treating Osteoporosis and Obesity With a Single Anti-FSH Agent?

In fertile women, FSH regulates follicular recruitment, supports follicle development and maturation, and participates in LH-triggered ovulation and luteinization (124, 125). Over the last decade, it has become increasingly clear that like other pituitary hormones (126–128), FSH has additional functions beyond reproduction, as evidenced by the expression of FSHR in bone and fat (17–19, 66) as well as in the placenta, endometrial tissue, monocytes, and several tumor tissues (60, 70, 129–133). Considering the notable detrimental effects of FSH on bone and body fat (17, 19, 87), we can deduce its global involvement in the physiology of aging and pathophysiology of age-related conditions, importantly osteoporosis and obesity. Equally intriguing is our therapeutic premise that the inhibition of FSH signaling, either genetically or with our polyclonal antibody, increases bone mass, reduces body fat, and induces thermogenic adipose tissue. We thus ask whether an anti-FSH agent can be used to prevent and treat both

osteoporosis and obesity in women (without reducing estrogen levels) and in men across the lifespan.

The concept of a high-FSH, estrogen replete state during the perimenopausal transition has been clearly documented through the SWAN, in which bone loss and visceral obesity track together ~2 to 3 years before menopause (16). This finding was recapitulated faithfully in a rat model in which ovotoxin 4-vinylcyclohexene diepoxide, administered to mimic gradual ovarian failure, triggered notable decreases in bone density (5% to 13%) during periods of increased FSH (and decreased inhibins) in the face of a prolonged estrogen-replete period (134). To leverage this therapeutic window in particular, and to provide a means of treating osteoporosis and obesity more generally in both sexes, we developed two monoclonal antibodies, one of which, Hf2, was raised against the receptor-binding epitope of human FSH $\beta$  (18, 19). In contrast to our polyclonal antibody (IC<sub>50</sub> ~100 nM) used in our proof-of-concept studies (19, 80, 81), Hf2 displayed an IC<sub>50</sub> of ~6 nM. It caused impressive reductions in body fat, triggered the “beiging” of white adipose tissue, and increased cortical thickness and trabecular bone volume in mice (18, 19). Overall, these studies lend support to our approach for treating osteoporosis and obesity, diseases that affect millions of women and men worldwide.

## Acknowledgments

**Financial Support:** Work at Icahn School of Medicine at Mount Sinai was supported by the National Institutes of Health (NIH) by R01 Grants DK113627 (to M.Z. and L.S.), AG40132 (to M.Z.), AR65932 (to M.Z.), and AR67066 (to M.Z.). The authors also acknowledge Mount Sinai Innovation Partners for their collaboration on the actions of FSH on bone. C.J.R. acknowledges the support of NIH/National Institute of General Medical Sciences (Grants P30 GM106391 and P30 GM103392), NIH/National Institute of Diabetes and Digestive and Kidney Diseases (Grant R24 DK92759), the Physiology Core Facility (Grant P20 GM103465), and COBRE in Stem Cell Biology and Regenerative Medicine.

**Correspondence:** Mone Zaidi, MD, PhD, Mount Sinai Bone Program, Endocrinology, Box 1055, One Gustave L. Levy Place, New York, New York 10029. E-mail: [mone.zaidi@mssm.edu](mailto:mone.zaidi@mssm.edu).

**Disclosure Summary:** M.Z. is a named inventor on a patent related to FSH and bone, owned by Icahn School of Medicine at Mount Sinai. M.Z. will receive royalties and/or licensing fees per Mount Sinai policies, in case the patent is commercialized. M.Z. also consults for Merck, Roche, and a number of financial consulting platforms. The remaining authors have nothing to disclose.

## References

1. Steinberg KK, Freni-Titulaer LW, DePuey EG, Miller DT, Sgoutas DS, Coralli CH, Phillips DL, Rogers TN, Clark RV. Sex steroids



- and bone density in premenopausal and perimenopausal women. *J Clin Endocrinol Metab.* 1989;69(3):533–539.
2. Chapurlat RD, Garnero P, Sornay-Rendu E, Arlot ME, Claustrat B, Delmas PD. Longitudinal study of bone loss in pre- and perimenopausal women: evidence for bone loss in perimenopausal women. *Osteoporos Int.* 2000;11(6):493–498.
  3. Ebeling PR, Atley LM, Guthrie JR, Burger HG, Dennerstein L, Hopper JL, Wark JD. Bone turnover markers and bone density across the menopausal transition. *J Clin Endocrinol Metab.* 1996; 81(9):3366–3371.
  4. Ito M, Nakamura T, Tsurusaki K, Uetani M, Hayashi K. Effects of menopause on age-dependent bone loss in the axial and appendicular skeletons in healthy Japanese women. *Osteoporos Int.* 1999;10(5):377–383.
  5. Perrone G, Galoppi P, Capri O, Anelli G, Borrello M, Zichella L. Lumbar and femoral bone density in perimenopausal women with irregular cycles. *Int J Fertil Menopausal Stud.* 1995;40(3): 120–125.
  6. Recker R, Lappe J, Davies K, Heaney R. Characterization of perimenopausal bone loss: a prospective study. *J Bone Miner Res.* 2000;15(10):1965–1973.
  7. Seifert-Klauss V, Link T, Heumann C, Lupp P, Haseitl M, Laakmann J, Rattenhuber J, Kiechle M. Influence of pattern of menopausal transition on the amount of trabecular bone loss. Results from a 6-year prospective longitudinal study. *Maturitas.* 2006;55(4):317–324.
  8. Seifert-Klauss V, Mueller JE, Lupp P, Probst R, Wilker J, Höss C, Treumann T, Kastner C, Ulm K. Bone metabolism during the perimenopausal transition: a prospective study. *Maturitas.* 2002; 41(1):23–33.
  9. Sowers MR, Finkelstein JS, Ettinger B, Bondarenko I, Neer RM, Cauley JA, Sherman S, Greendale GA; Study of Women's Health Across the Nation. The association of endogenous hormone concentrations and bone mineral density measures in pre- and perimenopausal women of four ethnic groups: SWAN. *Osteoporos Int.* 2003;14(1):44–52.
  10. Sowers MR, Greendale GA, Bondarenko I, Finkelstein JS, Cauley JA, Neer RM, Ettinger B. Endogenous hormones and bone turnover markers in pre- and perimenopausal women: SWAN. *Osteoporos Int.* 2003;14(3):191–197.
  11. Sowers MR, Jannausch M, McConnell D, Little R, Greendale GA, Finkelstein JS, Neer RM, Johnston J, Ettinger B. Hormone predictors of bone mineral density changes during the menopausal transition. *J Clin Endocrinol Metab.* 2006;91(4):1261–1267.
  12. Bainbridge KE, Sowers MF, Crutchfield M, Lin X, Jannausch M, Harlow SD. Natural history of bone loss over 6 years among premenopausal and early postmenopausal women. *Am J Epidemiol.* 2002;156(5):410–417.
  13. Boutroy S, Bouxsein ML, Munoz F, Delmas PD. In vivo assessment of trabecular bone microarchitecture by high-resolution peripheral quantitative computed tomography. *J Clin Endocrinol Metab.* 2005;90(12):6508–6515.
  14. Thurston RC, Sowers MR, Sternfeld B, Gold EB, Bromberger J, Chang Y, Joffe H, Crandall CJ, Waetjen LE, Matthews KA. Gains in body fat and vasomotor symptom reporting over the menopausal transition: the study of women's health across the nation. *Am J Epidemiol.* 2009;170(6):766–774.
  15. Senapati S, Gracia CR, Freeman EW, Sammel MD, Lin H, Kim C, Schwab RJ, Pien GW. Hormone variations associated with quantitative fat measures in the menopausal transition. *Climacteric.* 2014;17(2):183–190.
  16. Randolph JF Jr, Sowers M, Gold EB, Mohr BA, Luborsky J, Santoro N, McConnell DS, Finkelstein JS, Korenman SG, Matthews KA, Sternfeld B, Lasley BL. Reproductive hormones in the early menopausal transition: relationship to ethnicity, body size, and menopausal status. *J Clin Endocrinol Metab.* 2003;88(4):1516–1522.
  17. Sun L, Peng Y, Sharrow AC, Iqbal J, Zhang Z, Papachristou DJ, Zaidi S, Zhu LL, Yaroslavskiy BB, Zhou H, Zallone A, Sairam MR, Kumar TR, Bo W, Braun J, Cardoso-Landa L, Schaffler MB, Moonga BS, Blair HC, Zaidi M. FSH directly regulates bone mass. *Cell.* 2006;125(2):247–260.
  18. Ji Y, Liu P, Yuen T, Haider S, He J, Romero R, Chen H, Bloch M, Kim SM, Lizneva D, Munshi L, Zhou C, Lu P, Iqbal J, Cheng Z, New MI, Hsueh AJ, Bian Z, Rosen CJ, Sun L, Zaidi M. Epitope-specific monoclonal antibodies to FSH $\beta$  increase bone mass. *Proc Natl Acad Sci USA.* 2018;115(9):2192–2197.
  19. Liu P, Ji Y, Yuen T, Rendina-Ruedy E, DeMambro VE, Dhawan S, Abu-Amer W, Izadmehr S, Zhou B, Shin AC, Latif R, Thangeswaran P, Gupta A, Li J, Shnyder V, Robinson ST, Yu YE, Zhang X, Yang F, Lu P, Zhou Y, Zhu LL, Oberlin DJ, Davies TF, Reagan MR, Brown A, Kumar TR, Epstein S, Iqbal J, Avadhani NG, New MI, Molina H, van Klinken JB, Guo EX, Shertner C, Haider S, Bian Z, Sun L, Rosen CJ, Zaidi M. Blocking FSH induces thermogenic adipose tissue and reduces body fat. *Nature.* 2017;546(7656):107–112.
  20. Rosen CJ, Zaidi M. Contemporaneous reproduction of preclinical science: a case study of FSH and fat. *Ann N Y Acad Sci.* 2017; 1404(1):17–19.
  21. Harlow SD, Gass M, Hall JE, Lobo R, Maki P, Rebar RW, Sherman S, Sluss PM, de Villiers TJ, STRAW + 10 Collaborative Group. Executive summary of the Stages of Reproductive Aging Workshop + 10: addressing the unfinished agenda of staging reproductive aging. *J Clin Endocrinol Metab.* 2012;97(4): 1159–1168.
  22. Crandall CJ, Tseng CH, Karlamangla AS, Finkelstein JS, Randolph JF Jr, Thurston RC, Huang MH, Zheng H, Greendale GA. Serum sex steroid levels and longitudinal changes in bone density in relation to the final menstrual period. *J Clin Endocrinol Metab.* 2013;98(4):E654–E663.
  23. Recker R, Lappe J, Davies KM, Heaney R. Bone remodeling increases substantially in the years after menopause and remains increased in older osteoporosis patients. *J Bone Miner Res.* 2004; 19(10):1628–1633.
  24. Akhter MP, Lappe JM, Davies KM, Recker RR. Transmenopausal changes in the trabecular bone structure. *Bone.* 2007; 41(1):111–116.
  25. Seeman E, Bianchi G, Khosla S, Kanis JA, Orwoll E. Bone fragility in men—where are we? *Osteoporos Int.* 2006;17(11):1577–1583.
  26. Liu XS, Sajda P, Saha PK, Wehrli FW, Guo XE. Quantification of the roles of trabecular microarchitecture and trabecular type in determining the elastic modulus of human trabecular bone. *J Bone Miner Res.* 2006;21(10):1608–1617.
  27. Zsakai A, Mascie-Taylor N, Bodzsar EB. Relationship between some indicators of reproductive history, body fatness and the menopausal transition in Hungarian women. *J Physiol Anthropol.* 2015;34(1):35.
  28. Sternfeld B, Quesenberry CP Jr, Husson G. Habitual physical activity and menopausal symptoms: a case-control study. *J Womens Health.* 1999;8(1):115–123.
  29. Demerath EW, Rogers NL, Reed D, Lee M, Choh AC, Siervogel RM, Chumlea WC, Towne B, Czerwinski SA. Significant associations of age, menopausal status and lifestyle factors with visceral adiposity in African-American and European-American women. *Ann Hum Biol.* 2011;38(3):247–256.
  30. Trikudanathan S, Pedley A, Massaro JM, Hoffmann U, Seely EW, Murabito JM, Fox CS. Association of female reproductive factors with body composition: the Framingham Heart Study. *J Clin Endocrinol Metab.* 2013;98(1):236–244.
  31. Wing RR, Matthews KA, Kuller LH, Meilahn EN, Plantinga PL. Weight gain at the time of menopause. *Arch Intern Med.* 1991; 151(1):97–102.
  32. Sternfeld B, Wang H, Quesenberry CP Jr, Abrams B, Everson-Rose SA, Greendale GA, Matthews KA, Torrens JI, Sowers M. Physical activity and changes in weight and waist circumference in midlife women: findings from the Study of Women's Health Across the Nation. *Am J Epidemiol.* 2004;160(9):912–922.

33. Janssen I, Powell LH, Kazlauskaitė R, Dugan SA. Testosterone and visceral fat in midlife women: the Study of Women's Health Across the Nation (SWAN) fat patterning study. *Obesity (Silver Spring)*. 2010;18(3):604–610.
34. Kanaley JA, Giannopoulou I, Tillapaugh-Fay G, Nappi JS, Ploutz-Snyder LL. Racial differences in subcutaneous and visceral fat distribution in postmenopausal black and white women. *Metabolism*. 2003;52(2):186–191.
35. Lovejoy JC, Champagne CM, de Jonge L, Xie H, Smith SR. Increased visceral fat and decreased energy expenditure during the menopausal transition. *Int J Obes*. 2008;32(6):949–958.
36. Lee CG, Carr MC, Murdoch SJ, Mitchell E, Woods NF, Wener MH, Chandler WL, Boyko EJ, Brunzell JD. Adipokines, inflammation, and visceral adiposity across the menopausal transition: a prospective study. *J Clin Endocrinol Metab*. 2009;94(4):1104–1110.
37. Ho SC, Wu S, Chan SG, Sham A. Menopausal transition and changes of body composition: a prospective study in Chinese perimenopausal women. *Int J Obes*. 2010;34(8):1265–1274.
38. Franklin RM, Ploutz-Snyder L, Kanaley JA. Longitudinal changes in abdominal fat distribution with menopause. *Metabolism*. 2009;58(3):311–315.
39. Gambacciani M, Ciapponi M, Cappagli B, Benussi C, De Simone L, Genazzani AR. Climacteric modifications in body weight and fat tissue distribution. *Climacteric*. 1999;2(1):37–44.
40. Sowers M, Zheng H, Tomey K, Karvonen-Gutierrez C, Jannausch M, Li X, Yosef M, Symons J. Changes in body composition in women over six years at midlife: ovarian and chronological aging. *J Clin Endocrinol Metab*. 2007;92(3):895–901.
41. Toth MJ, Tchernof A, Sites CK, Poehlman ET. Menopause-related changes in body fat distribution. *Ann N Y Acad Sci*. 2000;904(1):502–506.
42. Kotani K, Tokunaga K, Fujioka S, Kobatake T, Keno Y, Yoshida S, Shimomura I, Tarui S, Matsuzawa Y. Sexual dimorphism of age-related changes in whole-body fat distribution in the obese. *Int J Obes Relat Metab Disord*. 1994;18(4):207–212.
43. Snead DB, Birge SJ, Kohrt WM. Age-related differences in body composition by hydrodensitometry and dual-energy X-ray absorptiometry. *J Appl Physiol (1985)*. 1993;74(2):770–775.
44. Tchernof A, Poehlman ET. Effects of the menopause transition on body fatness and body fat distribution. *Obes Res*. 1998;6(3):246–254.
45. Adami S, Bianchi G, Brandi ML, Giannini S, Ortolani S, DiMunno O, Frediani B, Rossini M; BONTURNO study group. Determinants of bone turnover markers in healthy premenopausal women. *Calcif Tissue Int*. 2008;82(5):341–347.
46. Gallagher CM, Moonga BS, Kovach JS. Cadmium, follicle-stimulating hormone, and effects on bone in women age 42–60 years, NHANES III. *Environ Res*. 2010;110(1):105–111.
47. García-Martín A, Reyes-García R, García-Castro JM, Rozas-Moreno P, Escobar-Jiménez F, Muñoz-Torres M. Role of serum FSH measurement on bone resorption in postmenopausal women. *Endocrine*. 2012;41(2):302–308.
48. Wu XY, Wu XP, Xie H, Zhang H, Peng YQ, Yuan LQ, Su X, Luo XH, Liao EY. Age-related changes in biochemical markers of bone turnover and gonadotropin levels and their relationship among Chinese adult women. *Osteoporos Int*. 2010;21(2):275–285.
49. Xu ZR, Wang AH, Wu XP, Zhang H, Sheng ZF, Wu XY, Xie H, Luo XH, Liao EY. Relationship of age-related concentrations of serum FSH and LH with bone mineral density, prevalence of osteoporosis in native Chinese women. *Clin Chim Acta*. 2009;400(1–2):8–13.
50. Cannon JG, Cortez-Cooper M, Meaders E, Stallings J, Haddow S, Kraj B, Sloan G, Mulloy A. Follicle-stimulating hormone, interleukin-1, and bone density in adult women. *Am J Physiol Regul Integr Comp Physiol*. 2010;298(3):R790–R798.
51. Gourlay ML, Preisser JS, Hammett-Stabler CA, Renner JB, Rubin J. Follicle-stimulating hormone and bioavailable estradiol are less important than weight and race in determining bone density in younger postmenopausal women. *Osteoporos Int*. 2011;22(10):2699–2708.
52. Cheung E, Tsang S, Bow C, Soong C, Yeung S, Loong C, Cheung CL, Kan A, Lo S, Tam S, Tang G, Kung A. Bone loss during menopausal transition among southern Chinese women. *Maturitas*. 2011;69(1):50–56.
53. Wang J, Zhang W, Yu C, Zhang X, Zhang H, Guan Q, Zhao J, Xu J. Follicle-stimulating hormone increases the risk of postmenopausal osteoporosis by stimulating osteoclast differentiation. *PLoS One*. 2015;10(8):e0134986.
54. Wang B, Song Y, Chen Y, Wang ES, Zheng D, Qu F, Zhou JH. Correlation analysis for follicle-stimulating hormone and C-terminal cross-linked telopeptides of type I collagen in menopausal transition women with osteoporosis. *Int J Clin Exp Med*. 2015;8(2):2417–2422.
55. Devleta B, Adem B, Senada S. Hypergonadotropic amenorrhea and bone density: new approach to an old problem. *J Bone Miner Metab*. 2004;22(4):360–364.
56. Podfigurna-Stopa A, Pludowski P, Jaworski M, Lorenc R, Genazzani AR, Meczekalski B. Skeletal status and body composition in young women with functional hypothalamic amenorrhea. *Gynecol Endocrinol*. 2012;28(4):299–304.
57. Özbek MN, Demirbilek H, Baran RT, Baran A. Bone mineral density in adolescent girls with hypogonadotropic and hypergonadotropic hypogonadism. *J Clin Res Pediatr Endocrinol*. 2016;8(2):163–169.
58. Rendina D, Gianfrancesco F, De Filippo G, Merlotti D, Esposito T, Mingione A, Nuti R, Strazzullo P, Mossetti G, Gennari L. FSHR gene polymorphisms influence bone mineral density and bone turnover in postmenopausal women. *Eur J Endocrinol*. 2010;163(1):165–172.
59. Mendoza N, Quereda F, Presa J, Salamanca A, Sánchez-Borrego R, Vázquez F, Martínez Astorquiza T. Estrogen-related genes and postmenopausal osteoporosis risk. *Climacteric*. 2012;15(6):587–593.
60. Robinson LJ, Tourkova I, Wang Y, Sharrow AC, Landau MS, Yaroslavskiy BB, Sun L, Zaidi M, Blair HC. FSH-receptor isoforms and FSH-dependent gene transcription in human monocytes and osteoclasts. *Biochem Biophys Res Commun*. 2010;394(1):12–17.
61. Sun L, Zhang Z, Zhu LL, Peng Y, Liu X, Li J, Agrawal M, Robinson LJ, Iqbal J, Blair HC, Zaidi M. Further evidence for direct pro-resorptive actions of FSH. *Biochem Biophys Res Commun*. 2010;394(1):6–11.
62. Wu Y, Torchia J, Yao W, Lane NE, Lanier LL, Nakamura MC, Humphrey MB. Bone microenvironment specific roles of ITAM adapter signaling during bone remodeling induced by acute estrogen-deficiency. *PLoS One*. 2007;2(7):e586.
63. Allan CM, Kalak R, Dunstan CR, McTavish KJ, Zhou H, Handelsman DJ, Seibel MJ. Follicle-stimulating hormone increases bone mass in female mice. *Proc Natl Acad Sci USA*. 2010;107(52):22629–22634.
64. Ritter V, Thuering B, Saint Mezard P, Luong-Nguyen NH, Seltenmeyer Y, Junker U, Fournier B, Susa M, Morvan F. Follicle-stimulating hormone does not impact male bone mass in vivo or human male osteoclasts in vitro. *Calcif Tissue Int*. 2008;82(5):383–391.
65. Tourkova IL, Witt MR, Li L, Larrouture Q, Liu L, Luo J, Robinson LJ, Blair HC. Follicle stimulating hormone receptor in mesenchymal stem cells integrates effects of glycoprotein reproductive hormones. *Ann N Y Acad Sci*. 2015;1335(1):100–109.
66. Feng Y, Zhu S, Antaris AL, Chen H, Xiao Y, Lu X, Jiang L, Diao S, Yu K, Wang Y, Herraiz S, Yue J, Hong X, Hong G, Cheng Z, Dai H, Hsueh AJ. Live imaging of follicle stimulating hormone receptors in gonads and bones using near infrared II fluorophore. *Chem Sci (Camb)*. 2017;8(5):3703–3711.
67. Meher BR, Dixit A, Bousfield GR, Lushington GH. Glycosylation effects on FSH-FSHR interaction dynamics: a case study of

- different FSH glycoforms by molecular dynamics simulations. *PLoS One*. 2015;10(9):e0137897.
68. Jiang C, Hou X, Wang C, May JV, Butnev VY, Bousfield GR, Davis JS. Hypoglycosylated hFSH has greater bioactivity than fully glycosylated recombinant hFSH in human granulosa Cells. *J Clin Endocrinol Metab*. 2015;100(6):E852–E860.
  69. Bousfield GR, Butnev VY, Rueda-Santos MA, Brown A, Hall AS, Harvey DJ. Macro- and micro-heterogeneity in pituitary and urinary follicle-stimulating hormone glycosylation. *J Glycomics Lipidomics*. 2014;4:1000125.
  70. Cannon JG, Kraj B, Sloan G. Follicle-stimulating hormone promotes RANK expression on human monocytes. *Cytokine*. 2011; 53(2):141–144.
  71. Iqbal J, Sun L, Kumar TR, Blair HC, Zaidi M. Follicle-stimulating hormone stimulates TNF production from immune cells to enhance osteoblast and osteoclast formation. *Proc Natl Acad Sci USA*. 2006;103(40):14925–14930.
  72. Liu S, Cheng Y, Fan M, Chen D, Bian Z. FSH aggravates periodontitis-related bone loss in ovariectomized rats. *J Dent Res*. 2010;89(4):366–371.
  73. Liu S, Cheng Y, Xu W, Bian Z. Protective effects of follicle-stimulating hormone inhibitor on alveolar bone loss resulting from experimental periapical lesions in ovariectomized rats. *J Endod*. 2010;36(4):658–663.
  74. Seibel MJ, Dunstan CR, Zhou H, Allan CM, Handelsman DJ. Sex steroids, not FSH, influence bone mass. *Cell*. 2006;127(6):1079, author reply 1080–1081.
  75. Oz OK, Hirasawa G, Lawson J, Nanu L, Constantinescu A, Antich PP, Mason RP, Tsyganov E, Parkey RW, Zerwekh JE, Simpson ER. Bone phenotype of the aromatase deficient mouse. *J Steroid Biochem Mol Biol*. 2001;79(1–5):49–59.
  76. Geng W, Yan X, Du H, Cui J, Li L, Chen F. Immunization with FSH $\beta$  fusion protein antigen prevents bone loss in a rat ovariectomy-induced osteoporosis model. *Biochem Biophys Res Commun*. 2013;434(2):280–286.
  77. Kawai H, Furuhashi M, Suganuma N. Serum follicle-stimulating hormone level is a predictor of bone mineral density in patients with hormone replacement therapy. *Arch Gynecol Obstet*. 2004; 269(3):192–195.
  78. Drake MT, McCready LK, Hoey KA, Atkinson EJ, Khosla S. Effects of suppression of follicle-stimulating hormone secretion on bone resorption markers in postmenopausal women. *J Clin Endocrinol Metab*. 2010;95(11):5063–5068.
  79. Woodruff TK, Khosla S. New hope for symptom management during natural and iatrogenic menopause transitions. *Biol Reprod*. 2017;97(2):177–178.
  80. Zhu LL, Blair H, Cao J, Yuen T, Latif R, Guo L, Tourkova IL, Li J, Davies TF, Sun L, Bian Z, Rosen C, Zallone A, New MI, Zaidi M. Blocking antibody to the  $\beta$ -subunit of FSH prevents bone loss by inhibiting bone resorption and stimulating bone synthesis. *Proc Natl Acad Sci USA*. 2012;109(36):14574–14579.
  81. Zhu LL, Tourkova I, Yuen T, Robinson LJ, Bian Z, Zaidi M, Blair HC. Blocking FSH action attenuates osteoclastogenesis. *Biochem Biophys Res Commun*. 2012;422(1):54–58.
  82. Gavaler JS, Rosenblum E. Predictors of postmenopausal body mass index and waist hip ratio in the oklahoma postmenopausal health disparities study. *J Am Coll Nutr*. 2003; 22(4):269–276.
  83. Seth B, Arora S, Singh R. Association of obesity with hormonal imbalance in infertility: a cross-sectional study in north Indian women. *Indian J Clin Biochem*. 2013;28(4):342–347.
  84. Gourlay ML, Specker BL, Li C, Hammett-Stabler CA, Renner JB, Rubin JE. Follicle-stimulating hormone is independently associated with lean mass but not BMD in younger postmenopausal women. *Bone*. 2012;50(1):311–316.
  85. Jaff NG, Norris SA, Snyman T, Toman M, Crowther NJ. Body composition in the Study of Women Entering and in Endocrine Transition (SWEET): a perspective of African women who have a high prevalence of obesity and HIV infection. *Metabolism*. 2015; 64(9):1031–1041.
  86. Ecochard R, Marret H, Barbato M, Boehringer H. Gonadotropin and body mass index: high FSH levels in lean, normally cycling women. *Obstet Gynecol*. 2000;96(1):8–12.
  87. Caillon H, Fréour T, Bach-Ngohou K, Colombel A, Denis MG, Barrière P, Masson D. Effects of female increased body mass index on in vitro fertilization cycles outcome. *Obes Res Clin Pract*. 2015;9(4):382–388.
  88. De Pergola G, Maldera S, Tartagni M, Pannacciulli N, Loverro G, Giorgino R. Inhibitory effect of obesity on gonadotropin, estradiol, and inhibin B levels in fertile women. *Obesity (Silver Spring)*. 2006;14(11):1954–1960.
  89. Tepper PG, Randolph JF Jr, McConnell DS, Crawford SL, El Khoudary SR, Joffe H, Gold EB, Zheng H, Bromberger JT, Sutton-Tyrrell K. Trajectory clustering of estradiol and follicle-stimulating hormone during the menopausal transition among women in the Study of Women's Health Across the Nation (SWAN). *J Clin Endocrinol Metab*. 2012;97(8):2872–2880.
  90. Ausmanas MK, Tan DA, Jaisamrarn U, Tian XW, Holinka CF. Estradiol, FSH and LH profiles in nine ethnic groups of postmenopausal Asian women: the Pan-Asia Menopause (PAM) study. *Climacteric*. 2007;10(5):427–437.
  91. Simoncig Netjasov A, Tančić-Gajić M, Ivočić M, Marina L, Arizanović Z, Vujović S. Influence of obesity and hormone disturbances on sexuality of women in the menopause. *Gynecol Endocrinol*. 2016;32(9):762–766.
  92. Bieniek JM, Kashanian JA, Deibert CM, Grober ED, Lo KC, Brannigan RE, Sandlow JI, Jarvi KA. Influence of increasing body mass index on semen and reproductive hormonal parameters in a multi-institutional cohort of subfertile men. *Fertil Steril*. 2016; 106(5):1070–1075.
  93. Foresta C, Di Mambro A, Pagano C, Garolla A, Vettor R, Ferlin A. Insulin-like factor 3 as a marker of testicular function in obese men. *Clin Endocrinol (Oxf)*. 2009;71(5):722–726.
  94. Casimirri F, Pasquali R, Cantobelli S, Melchionda N, Barbara L. [Obesity and adipose tissue distribution in men: relation to sex steroids and insulin]. *Minerva Endocrinol*. 1991;16(1):31–35.
  95. Yamacake KG, Cocuzza M, Torricelli FC, Tiseo BC, Frati R, Freire GC, Antunes AA, Srougi M. Impact of body mass index, age and varicocele on reproductive hormone profile from elderly men. *Int Braz J Urol*. 2016;42(2):365–372.
  96. Stefanska A, Sypniewska G, Ponikowska I, Cwiklinska-Jurkowska M. Association of follicle-stimulating hormone and sex hormone binding globulin with the metabolic syndrome in postmenopausal women. *Clin Biochem*. 2012;45(9):703–706.
  97. Stefanska A, Ponikowska I, Cwiklinska-Jurkowska M, Sypniewska G. Association of FSH with metabolic syndrome in postmenopausal women: a comparison with CRP, adiponectin and leptin. *Bio-markers Med*. 2014;8(7):921–930.
  98. Limonard EJ, Veldhuis-Vlug AG, van Dussen L, Runge JH, Tanck MW, Endert E, Heijboer AC, Fliers E, Hollak CE, Akkerman EM, Bisschop PH. Short-term effect of estrogen on human bone marrow fat. *J Bone Miner Res*. 2015;30(11):2058–2066.
  99. Martin RB, Zissimos SL. Relationships between marrow fat and bone turnover in ovariectomized and intact rats. *Bone*. 1991; 12(2):123–131.
  100. Fan Y, Hanai JL, Le PT, Bi R, Maridas D, DeMambro V, Figueroa CA, Kir S, Zhou X, Mannstadt M, Baron R, Bronson RT, Horowitz MC, Wu JY, Bilezikian JP, Dempster DW, Rosen CJ, Lanske B. Parathyroid hormone directs bone marrow mesenchymal cell fate. *Cell Metab*. 2017;25(3):661–672.
  101. Cohen P, Spiegelman BM. Brown and beige fat: molecular parts of a thermogenic machine. *Diabetes*. 2015;64(7):2346–2351.
  102. Wu J, Boström P, Sparks LM, Ye L, Choi JH, Giang AH, Khandekar M, Virtanen KA, Nuutila P, Schaart G, Huang K, Tu H, van Marken Lichtenbelt WD, Hoeks J, Enerbäck S, Schrauwen P, Spiegelman BM. Beige adipocytes are a distinct type of

- thermogenic fat cell in mouse and human. *Cell*. 2012;150(2):366–376.
103. Liu XM, Chan HC, Ding GL, Cai J, Song Y, Wang TT, Zhang D, Chen H, Yu MK, Wu YT, Qu F, Liu Y, Lu YC, Adashi EY, Sheng JZ, Huang HF. FSH regulates fat accumulation and redistribution in aging through the G $\alpha$ i/Ca(2+)/CREB pathway. *Aging Cell*. 2015;14(3):409–420.
  104. Cui H, Zhao G, Liu R, Zheng M, Chen J, Wen J. FSH stimulates lipid biosynthesis in chicken adipose tissue by upregulating the expression of its receptor FSHR. *J Lipid Res*. 2012;53(5):909–917.
  105. Rosenwald M, Perdikari A, Rüllicke T, Wolfrum C. Bi-directional interconversion of brite and white adipocytes. *Nat Cell Biol*. 2013;15(6):659–667.
  106. Wang QA, Tao C, Gupta RK, Scherer PE. Tracking adipogenesis during white adipose tissue development, expansion and regeneration. *Nat Med*. 2013;19(10):1338–1344.
  107. Munir JA, Wu H, Bauer K, Bindeman J, Byrd C, Feuerstein IM, Villines TC, Taylor AJ. The perimenopausal atherosclerosis transition: relationships between calcified and noncalcified coronary, aortic, and carotid atherosclerosis and risk factors and hormone levels. *Menopause*. 2012;19(1):10–15.
  108. Celestino Catão Da Silva D, Nogueira De Almeida Vasconcelos A, Cleto Maria Cerqueira J, De Oliveira Cipriano Torres D, Oliveira Dos Santos AC, De Lima Ferreira Fernandes Costa H, Bregieiro Fernandes Costa LO. Endogenous sex hormones are not associated with subclinical atherosclerosis in menopausal women. *Mimerva Ginecol*. 2013;65(3):297–302.
  109. Wang N, Shao H, Chen Y, Xia F, Chi C, Li Q, Han B, Teng Y, Lu Y. Follicle-stimulating hormone, its association with cardiometabolic risk factors, and 10-year risk of cardiovascular disease in postmenopausal women. *J Am Heart Assoc*. 2017;6(9):e005918.
  110. El Khoudary SR, Santoro N, Chen HY, Tepper PG, Brooks MM, Thurston RC, Janssen I, Harlow SD, Barinas-Mitchell E, Selzer F, Derby CA, Jackson EA, McConnell D, Matthews KA. Trajectories of estradiol and follicle-stimulating hormone over the menopause transition and early markers of atherosclerosis after menopause. *Eur J Prev Cardiol*. 2016;23(7):694–703.
  111. Bartke A. Can FSH influence longevity? *Aging Cell*. 2017;16(5):916–917.
  112. Bartke A, Sun LY, Longo V. Somatotrophic signaling: trade-offs between growth, reproductive development, and longevity. *Physiol Rev*. 2013;93(2):571–598.
  113. Brown-Borg HM, Borg KE, Meliska CJ, Bartke A. Dwarf mice and the ageing process. *Nature*. 1996;384(6604):33.
  114. Darcy J, McFadden S, Fang Y, Huber JA, Zhang C, Sun LY, Bartke A. Brown adipose tissue function is enhanced in long-lived, male Ames dwarf mice. *Endocrinology*. 2016;157(12):4744–4753.
  115. Heiman ML, Tinsley FC, Mattison JA, Hauck S, Bartke A. Body composition of prolactin-, growth hormone, and thyrotropin-deficient Ames dwarf mice. *Endocrine*. 2003;20(1–2):149–154.
  116. Westbrook R, Bonkowski MS, Strader AD, Bartke A. Alterations in oxygen consumption, respiratory quotient, and heat production in long-lived GHRKO and Ames dwarf mice, and short-lived bGH transgenic mice. *J Gerontol A Biol Sci Med Sci*. 2009;64(4):443–451.
  117. Li Y, Knapp JR, Kopchick JJ. Enlargement of interscapular brown adipose tissue in growth hormone antagonist transgenic and in growth hormone receptor gene-disrupted dwarf mice. *Exp Biol Med (Maywood)*. 2003;228(2):207–215.
  118. Chandrashekar V, Dawson CR, Martin ER, Rocha JS, Bartke A, Kopchick JJ. Age-related alterations in pituitary and testicular functions in long-lived growth hormone receptor gene-disrupted mice. *Endocrinology*. 2007;148(12):6019–6025.
  119. Tang K, Bartke A, Gardiner CS, Wagner TE, Yun JS. Gonadotropin secretion, synthesis, and gene expression in human growth hormone transgenic mice and in Ames dwarf mice. *Endocrinology*. 1993;132(6):2518–2524.
  120. Araujo AB, Wittert GA. Endocrinology of the aging male. *Best Pract Res Clin Endocrinol Metab*. 2011;25(2):303–319.
  121. Crawford ED, Schally AV, Pinthus JH, Block NL, Rick FG, Garnick MB, Eckel RH, Keane TE, Shore ND, Dahdal DN, Beveridge TJR, Marshall DC. The potential role of follicle-stimulating hormone in the cardiovascular, metabolic, skeletal, and cognitive effects associated with androgen deprivation therapy. *Urol Oncol*. 2017;35(5):183–191.
  122. Epstein S, Inzerillo AM, Caminis J, Zaidi M. Disorders associated with acute rapid and severe bone loss. *J Bone Miner Res*. 2003;18(12):2083–2094.
  123. Sowers M, Eyre D, Hollis BW, Randolph JF, Shapiro B, Jannausch ML, Crutchfield M. Biochemical markers of bone turnover in lactating and nonlactating postpartum women. *J Clin Endocrinol Metab*. 1995;80(7):2210–2216.
  124. McGee EA, Hsueh AJ. Initial and cyclic recruitment of ovarian follicles. *Endocr Rev*. 2000;21(2):200–214.
  125. Howles CM. Role of LH and FSH in ovarian function. *Mol Cell Endocrinol*. 2000;161(1–2):25–30.
  126. Zaidi M. Skeletal remodeling in health and disease. *Nat Med*. 2007;13(7):791–801.
  127. Zaidi M, New MI, Blair HC, Zallone A, Baliram R, Davies TF, Cardozo C, Iqbal J, Sun L, Rosen CJ, Yuen T. Actions of pituitary hormones beyond traditional targets. *J Endocrinol*. 2018;237(3):R83–R98.
  128. Zaidi M, Yuen T, Sun L, Rosen CJ. Regulation of skeletal homeostasis [published online ahead of print 11 June 2018]. *Endocr Rev*. 2018.
  129. Stillely JA, Christensen DE, Dahlem KB, Guan R, Santillan DA, England SK, Al-Hendy A, Kirby PA, Segaloff DL. FSH receptor (FSHR) expression in human extragonadal reproductive tissues and the developing placenta, and the impact of its deletion on pregnancy in mice. *Biol Reprod*. 2014;91(3):74.
  130. Ponikwicka-Tyszko D, Chrusciel M, Stelmaszewska J, Bernaczyk P, Sztachelska M, Sidorkiewicz I, Doroszko M, Tomaszewski J, Tapanainen JS, Huhtaniemi I, Wolczynski S, Rahman NA. Functional expression of FSH receptor in endometriotic lesions. *J Clin Endocrinol Metab*. 2016;101(7):2905–2914.
  131. Planeix F, Siraj MA, Bidard FC, Robin B, Pichon C, Sastre-Garau X, Antoine M, Ghinea N. Endothelial follicle-stimulating hormone receptor expression in invasive breast cancer and vascular remodeling at tumor periphery. *J Exp Clin Cancer Res*. 2015;34(1):12.
  132. Radu A, Pichon C, Camparo P, Antoine M, Allory Y, Couvelard A, Fromont G, Hai MT, Ghinea N. Expression of follicle-stimulating hormone receptor in tumor blood vessels. *N Engl J Med*. 2010;363(17):1621–1630.
  133. Siraj A, Desestret V, Antoine M, Fromont G, Huerre M, Sanson M, Camparo P, Pichon C, Planeix F, Gonin J, Radu A, Ghinea N. Expression of follicle-stimulating hormone receptor by the vascular endothelium in tumor metastases. *BMC Cancer*. 2013;13(1):246.
  134. Lukefahr AL, Frye JB, Wright LE, Marion SL, Hoyer PB, Funk JL. Decreased bone mineral density in rats rendered follicle-deplete by an ovotoxic chemical correlates with changes in follicle-stimulating hormone and inhibin A. *Calcif Tissue Int*. 2012;90(3):239–249.
